# Supplementary material for: Targeting B4GALT7 suppresses the proliferation, migration and invasion of hepatocellular carcinoma through the Cdc2/CyclinB1 and miR-338-3p/MMP2 pathway
Source: PeerJ. 2023 Nov 21;11:e16450. doi: 10.7717/peerj.16450 (PMC10668818; doi:10.7717/peerj.16450)
Supplement: Supplemental Information 1 [file peerj-11-16450-s001.xls]

## Sheet: Sheet1
		Figure 1E							Figure 2A
		B4GALT7							B4GALT7
			Replicate 1	Replicate 2	Replicate 3	average	SD			Replicate 1	Replicate 2	Replicate 3	average	SD
		1 normal	1	1	1	1	0		HL-7702	1	1	1	1	0
		1 tumor	11.994	11.5805	11.6955	11.7566	0.213442		SNU-423	3.45982	3.49503	3.77521	3.57669	0.172821
		2 normal	1	1	1	1	0		SMMC-7721	1.21357	1.33013	1.20334	1.24901	0.0704364
		2 tumor	5.81445	7.92999	6.59972	6.78139	1.06941		SK-Hep-1	2.46876	2.30467	2.44987	2.40777	0.0897804
		3 normal	1	1	1	1	0		HepG2	1.72465	1.91753	1.44726	1.69648	0.236401
		3 tumor	2.1976	2.60418	2.38975	2.39718	0.203389		Huh-7	1.87696	2.10646	1.60859	1.864	0.249191
		4 normal	1	1	1	1	0
		4 tumor	0.523746	0.308173	0.424671	0.418863	0.107904
		5 normal	1	1	1	1	0		Figure 2D
		5 tumor	0.77296	0.531059	0.499788	0.601269	0.149509		B4GALT7
		6 normal	1	1	1	1	0		SNU-423	Replicate 1	Replicate 2	Replicate 3	average	SD
		6 tumor	1.81712	1.66754	1.90173	1.79546	0.11859		shNC	1	1	1	1	0
		7 normal	1	1	1	1	0		shB4GALT7-1	0.369594	0.396237	0.378659	0.381497	0.0135463
		7 tumor	33.4329	21.6451	23.3792	26.1524	6.36441		shB4GALT7-2	0.469243	0.432386	0.457962	0.453197	0.0188849
		8 normal	1	1	1	1	0		shB4GALT7-3	0.36609	0.366899	0.367794	0.366928	0.000852362
		8 tumor	1.74128	1.79912	1.76845	1.76962	0.0289361
		9 normal	1	1	1	1	0
		9 tumor	3.30363	3.36891	3.31453	3.32903	0.0349709		Figure 2D
		10 normal	1	1	1	1	0		B4GALT7
		10 tumor	0.365112	0.390248	0.365748	0.373703	0.0143322		SK-Hep-1	Replicate 1	Replicate 2	Replicate 3	average	SD
									shNC	1	1	1	1	0
									shB4GALT7-1	0.355649	0.249372	0.325463	0.310161	0.0547659
									shB4GALT7-2	0.482044	0.411503	0.415362	0.436303	0.0396598
									shB4GALT7-3	0.290599	0.35476	0.314655	0.320005	0.0324133
		Figure 4B							Figure 4F
		miR-338-3p							miR-338-3p
			Replicate 1	Replicate 2	Replicate 3	average	SD		SNU-423	Replicate 1	Replicate 2	Replicate 3	average	SD
		HL-7702	1	1	1	1	0		miR NC	1	1	1	1	0
		SNU-423	0.512181	0.464301	0.487953	0.488145	0.0239406		miR-338-3p mimics	14640	9186.29	11213.4	11679.9	2756.63
		SK-Hep-1	0.023609	0.049025	0.032597	0.035077	0.0128882		miR inhibitor NC	1	1	1	1	0
									miR-338-3p inhibitor	0.835443	0.588703	0.597561	0.673902	0.139968
		Figure 4D
		miR-338-3p							miR-338-3p
			Replicate 1	Replicate 2	Replicate 3	average	SD		SK-Hep-1	Replicate 1	Replicate 2	Replicate 3	average	SD
		pEX-3/vector	1	1	1	1	0		miR NC	1	1	1	1	0
		pEX-3/B4GALT7	0.277449	0.274228	0.271897	0.274525	0.00278786		miR-338-3p mimics	35707.8	26448.9	31943.4	31366.7	4656.3
									miR inhibitor NC	1	1	1	1	0
		B4GALT7							miR-338-3p inhibitor	0.589703	0.563364	0.573542	0.575536	0.0132823
			Replicate 1	Replicate 2	Replicate 3	average	SD
		pEX-3/vector	1	1	1	1	0
		pEX-3/B4GALT7	3.6934	2.62804	3.01897	3.11347	0.538933		Figure 4G
									B4GALT7
									SNU-423	Replicate 1	Replicate 2	Replicate 3	average	SD
		Figure 4E							miR NC	1	1	1	1	0
		miR-338-3p							miR-338-3p mimics	0.186624	0.246374	0.209786	0.214261	0.0301254
		SNU-423	Replicate 1	Replicate 2	Replicate 3	average	SD		miR inhibitor NC	1	1	1	1	0
		shNC	1	1	1	1	0		miR-338-3p inhibitor	2.02843	1.76058	1.88715	1.89206	0.133992
		shB4GALT7-1	1.36466	2.10795	1.89564	1.78942	0.382862
		shB4GALT7-2	1.00619	1.48626	1.13413	1.20886	0.248605
		shB4GALT7-3	1.07733	1.29462	1.20546	1.19247	0.109227		B4GALT7
									SK-Hep-1	Replicate 1	Replicate 2	Replicate 3	average	SD
									miR NC	1	1	1	1	0
		miR-338-3p							miR-338-3p mimics	0.537997	0.671454	0.567364	0.592272	0.0701284
		SK-Hep-1	Replicate 1	Replicate 2	Replicate 3				miR inhibitor NC	1	1	1	1	0
		shNC	1	1	1	1	0		miR-338-3p inhibitor	2.17479	2.01411	1.98475	2.05789	0.102303
		shB4GALT7-1	2.99877	2.7889	2.81335	2.86701	0.114759
		shB4GALT7-2	1.33228	1.32357	1.24413	1.3	0.0485764
		shB4GALT7-3	1.39955	1.27613	1.39756	1.35775	0.0706897
